# Supplementary material for: Influence of Age and Body Mass Index on Total and Segmental Colonic Transit Times in Constipated Subjects
Source: PubMed Central journal article supplement — J Neurogastroenterol Motil. 2019 Apr 30;25(2):258–66. doi: 10.5056/jnm18167 (PMC6474702; doi:10.5056/jnm18167), 2019-04-30
Supplement: JNM-25-258_suppl.pdf [file JNM-25-258_suppl.pdf]

**Supplementary Table 1.** Characteristics of the Different Groups of Constipated Subjects

| Variables                | All         | IBS-C       | FC          | <i>P</i> -value | DD          | Non-DD      | <i>P</i> -value |
|--------------------------|-------------|-------------|-------------|-----------------|-------------|-------------|-----------------|
| Demographics             |             |             |             |                 |             |             |                 |
| Number                   | 354 (100)   | 139 (40)    | 215 (60)    | –               | 243 (69)    | 111(31)     | –               |
| Female                   | 297 (84)    | 125 (90)    | 172 (80)    | 0.017           | 205 (69)    | 92 (67)     | 0.756           |
| Age (yr)                 | 46.0 ± 15.9 | 44.9 ± 16.0 | 46.8 ± 15.8 | 0.275           | 45.8 ± 16.0 | 46.5 ± 15.6 | 0.698           |
| BMI (kg/m <sup>2</sup> ) | 25.5 ± 5.5  | 24.5 ± 4.3  | 26.1 ± 6.1  | 0.006           | 25.6 ± 5.6  | 25.2 ± 5.3  | 0.456           |
| Clinical phenotype       |             |             |             |                 |             |             |                 |
| IBS-C                    | 139 (39)    | 139 (100)   | 0 (0)       | –               | 110 (79)    | 29 (21)     | 0.001           |
| FC                       | 215 (61)    | 0 (0)       | 215 (100)   | –               | 133 (62)    | 82 (38)     |                 |
| Scales                   |             |             |             |                 |             |             |                 |
| Bristol stool form       | 2.1 ± 1.3   | 2.0 ± 1.4   | 2.1 ± 1.2   | 0.402           | 2.0 ± 1.3   | 2.3 ± 1.3   | 0.036           |
| LS-constipation          | 6.0 ± 2.5   | 6.6 ± 2.1   | 5.6 ± 2.6   | < 0.001         | 6.4 ± 2.2   | 5.0 ± 2.8   | < 0.001         |
| LS-bloating              | 5.1 ± 2.9   | 6.2 ± 2.6   | 4.5 ± 2.9   | < 0.001         | 5.4 ± 2.8   | 4.6 ± 2.9   | 0.013           |
| LS-abdominal pain        | 4.2 ± 2.9   | 5.7 ± 2.5   | 3.2 ± 2.8   | < 0.001         | 4.5 ± 2.9   | 3.5 ± 2.9   | 0.003           |
| CTT (hr)                 |             |             |             |                 |             |             |                 |
| Right CTT                | 22.9 ± 21.5 | 23.9 ± 22.1 | 22.3 ± 21.1 | 0.484           | 23.6 ± 19.5 | 21.5 ± 25.4 | 0.408           |
| Left CTT                 | 28.2 ± 22.4 | 31.0 ± 24.7 | 26.3 ± 20.6 | 0.055           | 29.4 ± 22.6 | 25.5 ± 21.8 | 0.129           |
| RSTT                     | 17.9 ± 17.2 | 18.0 ± 18.4 | 17.8 ± 16.4 | 0.929           | 18.2 ± 17.3 | 17.2 ± 16.9 | 0.634           |
| Total CTT                | 69.9 ± 43.3 | 73.1 ± 41.1 | 67.9 ± 44.6 | 0.271           | 71.1 ± 38.5 | 67.2 ± 52.3 | 0.434           |

IBS-C, irritable bowel syndrome with constipation; FC, functional constipation; DD, defecation disorders; BMI, body mass index; LS, Likert scale; CTT, colonic transit time; RSTT, rectosigmoid transit time.

Quantitative parameters are expressed as mean ± SD and qualitative parameters are shown as n (%).

*P* < 0.05 was considered significant.

**Supplementary Table 2.** Characteristics of the Constipated Subjects According to the Gender

| Variables                | All         | Males       | Females     | P-value |
|--------------------------|-------------|-------------|-------------|---------|
| Demographics             |             |             |             |         |
| Number                   | 354 (100)   | 57 (16)     | 297 (84)    |         |
| Age (yr)                 | 46.0 ± 15.9 | 48.9 ± 15.5 | 45.5 ± 15.9 | 0.342   |
| BMI (kg/m <sup>2</sup> ) | 25.5 ± 5.5  | 26.0 ± 5.0  | 25.4 ± 5.6  | 0.638   |
| Clinical phenotype       |             |             |             |         |
| IBS-C                    | 139 (39)    | 14 (10)     | 125 (90)    | 0.017   |
| FC                       | 215 (61)    | 43 (20)     | 172 (80)    |         |
| DD                       | 243 (69)    | 38 (67)     | 205 (69)    | 0.756   |
| Scales                   |             |             |             |         |
| Bristol stool form       | 2.1 ± 1.3   | 2.5 ± 1.5   | 2.0 ± 1.2   | 0.033   |
| LS-constipation          | 6.0 ± 2.5   | 5.3 ± 2.6   | 6.1 ± 2.4   | 0.021   |
| LS-bloating              | 5.1 ± 2.9   | 4.1 ± 2.8   | 5.3 ± 2.9   | 0.021   |
| LS-abdominal pain        | 4.2 ± 2.9   | 3.4 ± 2.8   | 4.3 ± 2.9   | 0.003   |
| CTT (hr)                 |             |             |             |         |
| Right CTT                | 22.9 ± 21.5 | 19.5 ± 16.9 | 23.6 ± 22.2 | 0.140   |
| Left CTT                 | 28.2 ± 22.4 | 25.3 ± 20.5 | 28.8 ± 22.7 | 0.430   |
| RSTT                     | 17.9 ± 17.2 | 13.1 ± 13.1 | 18.8 ± 17.7 | 0.185   |
| Total CTT                | 69.9 ± 43.3 | 57.8 ± 37.4 | 72.2 ± 44.0 | 0.282   |

BMI, body mass index; IBS-C, irritable bowel syndrome with constipation; FC, functional constipation; DD, defecation disorders; LS, Likert scale; CTT, colonic transit time; RSTT, rectosigmoid transit time.

Quantitative parameters are expressed as mean ± SD and qualitative parameters are shown as n (%).

*P* < 0.05 was considered significant.

**Supplementary Table 3.** Correlation Between Total and Segmental Colonic Transit Time and Self-reported Evaluation of Symptoms

| Scales             | Right CTT |                 | Left CTT |                 | RSTT     |                 | Total CTT |                 |
|--------------------|-----------|-----------------|----------|-----------------|----------|-----------------|-----------|-----------------|
|                    | <i>r</i>  | <i>P</i> -value | <i>r</i> | <i>P</i> -value | <i>r</i> | <i>P</i> -value | <i>r</i>  | <i>P</i> -value |
| LS-constipation    | 0.164     | 0.002           | 0.181    | 0.001           | 0.057    | 0.282           | 0.222     | < 0.001         |
| LS-bloating        | 0.068     | 0.204           | 0.033    | 0.538           | -0.119   | 0.025           | -0.002    | 0.975           |
| LS-abdominal pain  | 0.104     | 0.050           | 0.051    | 0.342           | -0.079   | 0.139           | 0.064     | 0.233           |
| Bristol stool form | -0.130    | 0.014           | -0.201   | < 0.001         | -0.142   | 0.007           | -0.235    | < 0.001         |

CTT, colonic transit time; RSTT, rectosigmoid transit time; LS, Likert scale.  
*P* < 0.05 was considered significant.
